# Supplementary material
Source: publisher figshare collection journal article supplement (https://frontiersin.figshare.com/ndownloader/files/28848837)
Supplement: Supplementary file [file 28848837]

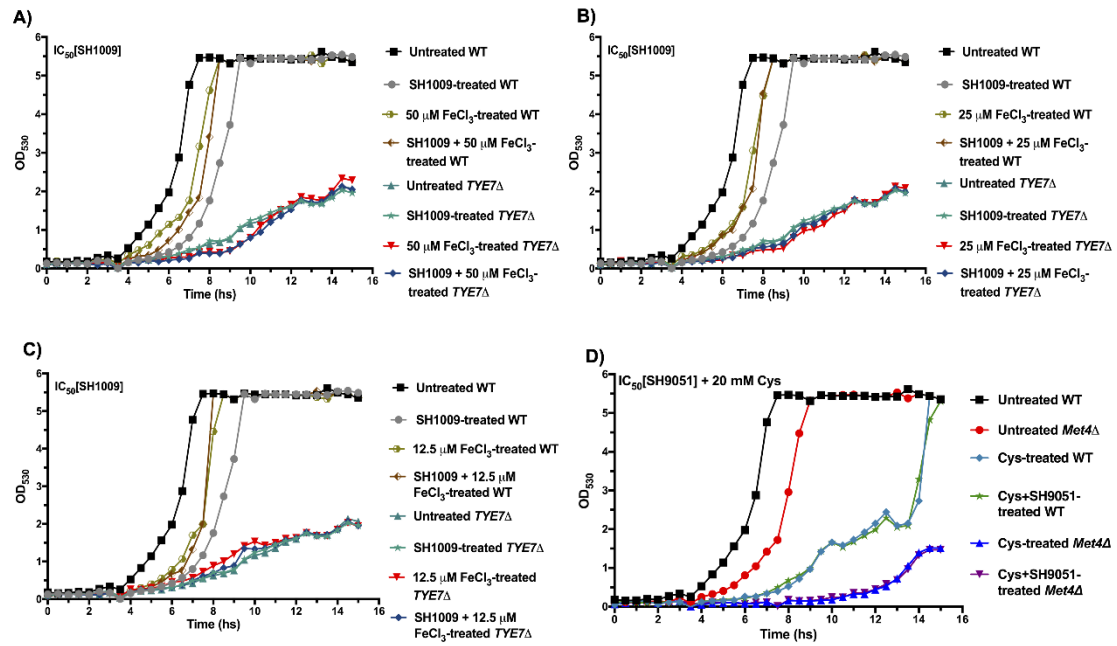

**S4 Figure:** (A, B, and C) The growth curves of *C. albicans* SC5314 wild-type strain and the *TYE7Δ* mutant under the IC<sub>50</sub> concentration of aurone SH1009 (16 μM) supplemented with different concentrations of FeCl<sub>3</sub> (50, 25, and 12,5 μM). The growth conditions were carried out in YPD broth media using the Bioscreen C growth curve instrument and the OD<sub>530</sub> reads were recorded at 30 min intervals for 24 h incubation at 30 °C. **D)** The growth curves of *C. albicans* SC5314 wild-type strain and the *MET4Δ* mutant under the IC<sub>50</sub> concentration of aurone SH9051 (90 μM) supplemented with 20 mM cysteine showed insignificant differences in growth for the wild type and mutant strains in contrast to treatment with 10 mM cysteine (in the main manuscript) that produced more susceptible growth for the *MET4Δ* mutant (**Figure 6F**).
